# Supplementary material
Source: HighWire-hosted journal article supplement (https://www.qdcxjkg.com/highwire/filestream/113561/field_highwire_adjunct_files/15/FIGURE_1.pdf)
Supplement: FIGURE_1.pdf [file FIGURE_1.pdf]

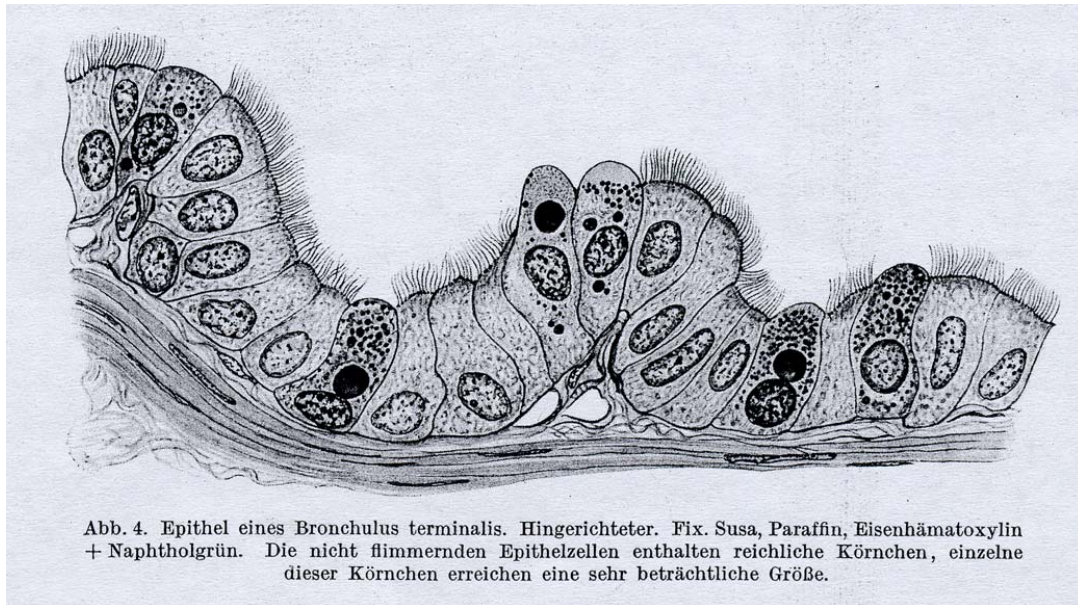

FIGURE 1. Figure from Clara's original description published 1937. The original caption reads: "Epithelium from a terminal bronchiolus. Executed man. Fix[ation] Susa, paraffin, ferrous haematoxylin + naphthol green. The non-ciliated cells contain many granules, some of these granules reaching a considerable size." Reproduced from [1]. Every effort has been made to contact the copyright holder of this reference to obtain permission for the usage of the figure. Should you have any concerns regarding copyright of this figure, please contact the ERS Publications Office ([info@ersj.org.uk](mailto:info@ersj.org.uk)) in the first instance.
